# Supplementary material
Source: publisher figshare collection journal article supplement (https://karger.figshare.com/ndownloader/files/38312694)
Supplement: Supplementary file 1 [file 38312694]

**Supplementary Material**

**List of eligible articles for this review**

1. Berkhemer OA, Fransen PS, Beumer D, van den Berg LA, Lingsma HF, Yoo AJ, et al. A randomized trial of intraarterial treatment for acute ischemic stroke [published correction appears in N Engl J Med. 2015 Jan 22;372(4):394]. N Engl J Med. 2015;372(1):11-20. doi:10.1056/NEJMoa1411587
2. Goyal M, Demchuk AM, Menon BK, Eesa M, Rempel JL, Thornton J, et al. Randomized assessment of rapid endovascular treatment of ischemic stroke. N Engl J Med. 2015;372(11):1019-1030. doi:10.1056/NEJMoa1414905
3. Saver JL, Goyal M, Bonafe A, Diener HC, Levy EI, Pereira VM, et al. Stent-retriever thrombectomy after intravenous t-PA vs. t-PA alone in stroke. N Engl J Med. 2015;372(24):2285-2295. doi:10.1056/NEJMoa1415061
4. Campbell BC, Mitchell PJ, Kleinig TJ, Dewey HM, Churilov L, Yassi N, et al. Endovascular therapy for ischemic stroke with perfusion-imaging selection. N Engl J Med. 2015;372(11):1009-1018. doi:10.1056/NEJMoa1414792
5. Jovin TG, Chamorro A, Cobo E, de Miquel MA, Molina CA, Rovira A, et al. Thrombectomy within 8 hours after symptom onset in ischemic stroke. N Engl J Med. 2015;372(24):2296-2306. doi:10.1056/NEJMoa1503780
6. Menon BK, Hill MD, Davalos A, Roos YBWEM, Campbell BCV, Dippel DWJ, et al. Efficacy of endovascular thrombectomy in patients with M2 segment middle cerebral artery occlusions: meta-analysis of data from the HERMES Collaboration. J Neurointerv Surg. 2019;11(11):1065-1069. doi:10.1136/neurintsurg-2018-014678
7. Saber H, Narayanan S, Palla M, Saver JL, Nogueira RG, Yoo AJ, et al. Mechanical thrombectomy for acute ischemic stroke with occlusion of the M2 segment of the middle cerebral artery: a meta-analysis. J Neurointerv Surg. 2018;10(7):620-624. doi:10.1136/neurintsurg-2017-013515.
8. Rai AT, Domico JR, Buseman C, Tarabishy AR, Fulks D, Lucke-Wold N, et al. A population-based incidence of M2 strokes indicates potential expansion of large vessel occlusions amenable to endovascular therapy. J Neurointerv Surg. 2018;10(6):510-515. doi:10.1136/neurintsurg-2017-013371
9. Hakim A, Gralla J, Rozeik C, Mordasini P, Leidolt L, Piechowiak E, et al. Anomalies and Normal Variants of the Cerebral Arterial Supply: A Comprehensive Pictorial Review with a Proposed Workflow for Classification and Significance. J Neuroimaging. 2018;28(1):14-35. doi:10.1111/jon.12475
10. Umansky F, Juarez SM, Dujovny M, Ausman JI, Diaz FG, Gomes F, et al. Microsurgical anatomy of the proximal segments of the middle cerebral artery. J Neurosurg. 1984;61(3):458-467. doi:10.3171/jns.1984.61.3.0458
11. Reci V, Bexheti S. Variations of shape, length, branching, and end trunks of M1 segment of middle cerebral artery. J Neurol Sci Disord 2019;5(1): 052-056. DOI: 10.17352/jnnsd.000034
12. Oo EM, Saw KEE, Oo HN, Than T, Thida K. Variable Anatomy of the Middle Cerebral Artery from Its Origin to the Edge of the Sylvian Fissure: A Direct Fresh Brain Study. Sci World J. 2021:6652676. Published 2021 Mar 9. doi:10.1155/2021/6652676
13. Saver JL, Chapot R, Agid R, Hassan A, Jadhav AP, Liebeskind DS, et al. Thrombectomy for Distal, Medium Vessel Occlusions: A Consensus Statement on Present Knowledge and Promising Directions [published correction appears in Stroke. 2020 Oct;51(10):e296]. Stroke. 2020;51(9):2872-2884. doi:10.1161/STROKEAHA.120.028956
14. Sarraj A, Sangha N, Hussain MS, Wisco D, Vora N, Elijovich L, et al. Endovascular Therapy for Acute Ischemic Stroke With Occlusion of the Middle Cerebral Artery M2 Segment. JAMA Neurol. 2016;73(11):1291-1296. doi:10.1001/jamaneurol.2016.2773
15. Recommendations on angiographic revascularization grading standards for acute ischemic stroke: a consensus statement. Stroke. 2013;44(9):2650-2663. doi:10.1161/STROKEAHA.113.001972
16. Goyal M, Ospel JM, Menon BK, Hill, M.D. MeVO: the next frontier? J Neurointerv Surg. (2020) 12:545–7. doi: 10.1136/neurintsurg-2020-015807
17. Sarraj A, Parsons M, Bivard A, Hassan AE, Abraham MG, Wu T, et al. Endovascular Thrombectomy Versus Medical Management in Isolated M2 Occlusions: Pooled Patient-Level Analysis from the EXTEND-IA Trials, INSPIRE, and SELECT Studies. Ann Neurol. 2022;91(5):629-639. doi:10.1002/ana.26331
18. Powers WJ, Rabinstein AA, Ackerson T, Adeoye OM, Bambakidis NC, Becker K, et al. Guidelines for the Early Management of Patients With Acute Ischemic Stroke: 2019 Update to the 2018 Guidelines for the Early Management of Acute Ischemic Stroke: A Guideline for Healthcare Professionals From the American Heart Association/American Stroke Association [published correction appears in Stroke. 2019 Dec;50(12):e440-e441]. *Stroke*. 2019;50(12):e344-e418. doi:10.1161/STR.0000000000000211
19. Kunz WG, Fabritius MP, Sommer WH, Höhne C, Scheffler P, Rotkopf LT, et al. Effect of stroke thrombolysis predicted by distal vessel occlusion detection. *Neurology*. 2018;90(20):e1742-e1750. doi:10.1212/WNL.0000000000005519
20. Ospel JM, Menon BK, Demchuk AM, Almekhlafi MA, Kashani N, Mayank A, et al. Clinical Course of Acute Ischemic Stroke Due to Medium Vessel Occlusion With and Without Intravenous Alteplase Treatment. *Stroke*. 2020;51(11):3232-3240. doi:10.1161/STROKEAHA.120.030227
21. Gibo H, Carver CC, Rhoton AL Jr, Lenkey C, Mitchell RJ. Microsurgical anatomy of the middle cerebral artery. J Neurosurg. 1981;54(2):151-169. doi:10.3171/jns.1981.54.2.0151
22. Tanriover N, Kawashima M, Rhoton AL Jr, Ulm AJ, Mericle RA. Microsurgical anatomy of the early branches of the middle cerebral artery: morphometric analysis and classification with angiographic correlation. J Neurosurg. 2003;98(6):1277-1290. doi:10.3171/jns.2003.98.6.1277
23. Goyal M, Menon BK, Krings T, Patil S, Qazi E, McTaggart RA, et al. What constitutes the M1 segment of the middle cerebral artery?. J Neurointerv Surg. 2016;8(12):1273-1277. doi:10.1136/neurintsurg-2015-012191
24. Brzegowy P, Polak J, Wnuk J, Łasocha B, Walocha J, Popiela TJ. Middle cerebral artery anatomical variations and aneurysms: a retrospective study based on computed tomography angiography findings. Folia Morphol (Warsz). 2018;77(3):434-440. doi:10.5603/FM.a2017.0112
25. Goyal M, Kappelhof M, McDonough R, Ospel JM. Secondary Medium Vessel Occlusions: When Clots Move North. Stroke. 2021;52(3):1147-1153. doi:10.1161/STROKEAHA.120.032799
26. Tayebi Meybodi A, Lawton MT, Griswold D, Mokhtari P, Payman A, Benet A. The anterior temporal artery: an underutilized but robust donor for revascularization of the distal middle cerebral artery. J Neurosurg. 2017;127(4):740-747. doi:10.3171/2016.8.JNS161225
27. Khatri R, Qureshi MA, Chaudhry MRA, Maud A, Vellipuram AR, Cruz-Flores S, et al. The Angiographic Anatomy of the Sphenoidal Segment of the Middle Cerebral Artery and Its Relevance in Mechanical Thrombectomy. Interv Neurol. 2020;8(2-6):231-241. doi:10.1159/000502545
28. Tomsick TA, Carrozzella J, Foster L, Hill MD, von Kummer R, Goyal M, et al. Endovascular Therapy of M2 Occlusion in IMS III: Role of M2 Segment Definition and Location on Clinical and Revascularization Outcomes. AJNR Am J Neuroradiol. 2017;38(1):84-89. doi:10.3174/ajnr.A4979
29. Fasen BACM, Heijboer RJJ, Hulsmans FH, Kwee RM. CT Angiography in Evaluating Large-Vessel Occlusion in Acute Anterior Circulation Ischemic Stroke: Factors Associated with Diagnostic Error in Clinical Practice. AJNR Am J Neuroradiol. 2020;41(4):607-611. doi:10.3174/ajnr.A6469
30. Ospel JM, Bala F, McDonough RV, Volny O, Kashani N, Qiu W, et al. Interrater Agreement and Detection Accuracy for Medium-Vessel Occlusions Using Single-Phase and Multiphase CT Angiography. AJNR Am J Neuroradiol. 2022;43(1):93-97. doi:10.3174/ajnr.A7361
31. Amukotuwa SA, Wu A, Zhou K, Page I, Brotchie P, Bammer R. Distal Medium Vessel Occlusions Can Be Accurately and Rapidly Detected Using *Tmax* Maps. *Stroke*. 2021;52(10):3308-3317. doi:10.1161/STROKEAHA.120.032941
32. Goyal M, Menon BK, van Zwam WH, Dippel DW, Mitchell PJ, Demchuk AM, et al. Endovascular thrombectomy after large-vessel ischaemic stroke: a meta-analysis of individual patient data from five randomised trials. Lancet. 2016;387(10029):1723-1731. doi:10.1016/S0140-6736(16)00163-X
